# Supplementary material for: Medanta insulin protocols in patients undergoing cardiac surgery
Source: PubMed Central journal article supplement — Indian J Endocrinol Metab. 2014 Jul-Aug;18(4):455–67. doi: 10.4103/2230-8210.137486 (PMC4138898; doi:10.4103/2230-8210.137486), 2014
Supplement: IJEM-18-455_App1.pdf [file IJEM-18-455_App1.pdf]

Appendix 1

**Glucose Monitoring Chart for Patients on Subcutaneous Insulin**

“Sliding scale” insulin is an ineffective mode of therapy. It should not be used with our patients.

**Hypoglycemia** (blood glucose less than 80mg/dl):

- For patient who can take orally, give 15 grams (3 teaspoons) of glucose or sugar.
- If patient cannot take orally, give 50ml 25%dextrose IV push.
- Check fingerstick glucose every 15 minutes and repeat above treatment until BG is >100 mg/dl.
- Do not arbitrarily “hold” insulin without calling. Please call if dose change needed.

- Give Novorapid, Humalog, or Apidra insulin immediately before eating.
- Give Regular insulin (e.g. Actrapid or Huminsulin-R) 30 minutes before eating.
- Basal insulin (NPH, Lantus or levemir) is given irrespective of mealtime.

**Please call the endocrinologist** in case of

- changes in patient’s diet
- patient NPO
- TPN started or stopped
- Steroids started or stopped

**Timing:**

**Scheduled insulin doses (to be filled by doctor)**

| Time                | Date →  |  |  |  |  |  |
|---------------------|---------|--|--|--|--|--|
|                     | Insulin |  |  |  |  |  |
| Before breakfast    |         |  |  |  |  |  |
| Before lunch        |         |  |  |  |  |  |
| Before dinner       |         |  |  |  |  |  |
| Bedtime             |         |  |  |  |  |  |
| Doctor’s Signature: |         |  |  |  |  |  |

**Correction doses for mealtime insulin:**

| Blood glucose (mg/dl) | Change in dose |
|-----------------------|----------------|
| <65                   |                |
| 66 to 80              |                |
| 81 to 100             |                |
| 101 to 180            |                |
| 181 to 220            |                |
| 221 to 250            |                |
| 251 to 300            |                |

**Blood glucose monitoring**

Before meals and 2 hours after dinner

**Target blood Glucose:**

**Blood Glucose Chart (to be filled by nurse)**

| Date | Time             | Blood glucose | Insulin name | Insulin dose(units) | Nurse's Signature | Remarks |
|------|------------------|---------------|--------------|---------------------|-------------------|---------|
|      | Before Breakfast |               |              |                     |                   |         |
|      | Before Lunch     |               |              |                     |                   |         |
|      | Before Dinner    |               |              |                     |                   |         |
|      | Bedtime          |               |              |                     |                   |         |
|      | Before Breakfast |               |              |                     |                   |         |
|      | Before Lunch     |               |              |                     |                   |         |
|      | Before Dinner    |               |              |                     |                   |         |
|      | Bedtime          |               |              |                     |                   |         |
|      | Before Breakfast |               |              |                     |                   |         |
|      | Before Lunch     |               |              |                     |                   |         |
|      | Before Dinner    |               |              |                     |                   |         |
|      | Bedtime          |               |              |                     |                   |         |
|      | Before Breakfast |               |              |                     |                   |         |
|      | Before Lunch     |               |              |                     |                   |         |
|      | Before Dinner    |               |              |                     |                   |         |
|      | Bedtime          |               |              |                     |                   |         |
|      | Before Breakfast |               |              |                     |                   |         |
|      | Before Lunch     |               |              |                     |                   |         |
|      | Before Dinner    |               |              |                     |                   |         |
|      | Bedtime          |               |              |                     |                   |         |

### Glucose Monitoring Chart for Patients on Insulin Infusion

#### Hypoglycemia

- Blood glucose 60 to 80 mg/dl, give 50ml 25% dextrose IV push.
- Blood glucose less than 60 mg/dl, give 100ml 25% dextrose IV push.
- Check fingerstick glucose q15 minutes and repeat above treatment until BG is >100 mg/dl.
- Do not arbitrarily “hold” insulin without calling. Please call if dose change needed.

#### Please call the endocrinologist in case

- Patient started on soft diet
- TPN started or stopped
- Steroids started or stopped

#### To prepare insulin infusion

Add 40 units (1ml) of 40U Regular Insulin to 39 ml 0.9% normal saline.

#### Insulin infusion Advice

- Monitor blood glucose 2 hourly
- **Target blood glucose:**
- Adjust the rate of infusion as per the following scale  
(to be filled by doctor)

| Date→                 |                |                |                |                |                |                |                |
|-----------------------|----------------|----------------|----------------|----------------|----------------|----------------|----------------|
| Blood glucose (mg/dl) | Rate (ml/hour) |
| Less than 80          |                |                |                |                |                |                |                |
| 81 to 100             |                |                |                |                |                |                |                |
| 101 to 120            |                |                |                |                |                |                |                |
| 121 to 140            |                |                |                |                |                |                |                |
| 141 to 160            |                |                |                |                |                |                |                |
| 161 to 180            |                |                |                |                |                |                |                |
| 181 to 200            |                |                |                |                |                |                |                |
| 201 to 220            |                |                |                |                |                |                |                |
| 221 to 250            |                |                |                |                |                |                |                |
| 251 to 300            |                |                |                |                |                |                |                |
| >300                  |                |                |                |                |                |                |                |
| Doctor's Signature:   |                |                |                |                |                |                |                |
