# Supplementary material for: Medanta insulin protocols in patients undergoing cardiac surgery
Source: PubMed Central journal article supplement — Indian J Endocrinol Metab. 2014 Jul-Aug;18(4):455–67. doi: 10.4103/2230-8210.137486 (PMC4138898; doi:10.4103/2230-8210.137486), 2014
Supplement: IJEM-18-455_App2.pdf [file IJEM-18-455_App2.pdf]

## Appendix 2

### PERI-OP AND PERI-PROCEDURE ORDERS

#### For Type 2 diabetes patients undergoing surgery under GA (e.g. CABG)

- HbA1c.....
- Creatinine.....
- **Antidiabetic medications till the day before surgery-**
- Procedures should preferably be scheduled for the early morning if possible.
- BGs should be checked every 2 hours before, during, and after procedure.
- Give 5% dextrose or DNS @100ml/ hour 6 am onwards. (*if NPO >4 hrs*)
- Add regular insulin to 5% D/ DNS as per the blood glucose level at 6am (*if NPO >4 hrs*)

| Blood glucose (mg/dl) | Regular insulin (to be added to 500ml of 5% D/ DNS) |
|-----------------------|-----------------------------------------------------|
| <80                   |                                                     |
| 81 to 150             |                                                     |
| 151 to 200            |                                                     |

Inform if blood glucose less than 80 or more than 200 mg/dl.

- Shift to insulin infusion **postoperatively till the patient is NPO**-start column 3.
- If the patient is on vasopressors, start column 6.
- **Shift to subcutaneous insulin once oral soft diet starts** as per the following chart

| Time             | Insulin | Dose |
|------------------|---------|------|
| Before breakfast |         |      |
| Before lunch     |         |      |
| Before dinner    |         |      |
| Bedtime          |         |      |

Patient Label

Medanta Insulin Infusion Protocol for CABG patients

**Patient ID:** \_\_\_\_\_ **Target glucose range:** \_\_\_\_ to \_\_\_\_ (110-180 mg/dl if not specified)

**Instructions:**

- Dosage of insulin is to be given only as per one of the columns on next page
- Change of dosage column must be noted in the sheet below.

**Monitoring blood glucose**

- When BG is within target range - check BG every two hours
- 'When BG is outside target range - check BG at least once an hour

**Changing insulin dosage**

- If three consecutive readings, more than 200 mg/dl - Increase column by 1
- If two consecutive readings, less than 100 mg/dl - Reduce the column by 1

**In case of hypoglycemia**

- Blood glucose 60 to 80 mg/dl, give 50ml 25% dextrose IV push.
- Blood glucose less than 60 mg/dl, give 100ml 25% dextrose IV push.
- Check fingerstick glucose 15 minutes and repeat above treatment until BG is >100 mg/dl.
- Do not arbitrarily “hold” insulin without calling. Please call if dose change needed.

**Please call the endocrinologist in case**

- Patient started on soft diet
- TPN started or stopped
- Steroids started or stopped

**To prepare insulin infusion**

Add 40 units (1ml) of 40U Regular Insulin to 39 ml 0.9% normal saline.

| Date | Time | Dosage column | Reason | Nurse sign | TL/<br>doctor sign |
|------|------|---------------|--------|------------|--------------------|
|      |      |               |        |            |                    |
|      |      |               |        |            |                    |
|      |      |               |        |            |                    |
|      |      |               |        |            |                    |
|      |      |               |        |            |                    |
|      |      |               |        |            |                    |
|      |      |               |        |            |                    |
|      |      |               |        |            |                    |
|      |      |               |        |            |                    |
|      |      |               |        |            |                    |

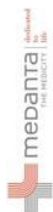

Patient Label

↓ Patients not on vasopressors start here ↓

↓ Patients on vasopressors start here ↓

| COLUMN 1              |              | COLUMN 2              |              | COLUMN 3              |              | COLUMN 4              |              | COLUMN 5              |              | COLUMN 6              |              | COLUMN 7              |              |
|-----------------------|--------------|-----------------------|--------------|-----------------------|--------------|-----------------------|--------------|-----------------------|--------------|-----------------------|--------------|-----------------------|--------------|
| Blood glucose (mg/dl) | Rate (ml/hr) |
| Less than 80          | 0            |
| 81 to 100             | 0.0          | 81 to 100             | 0.2          | 81 to 100             | 0.3          | 81 to 100             | 0.4          | 81 to 100             | 0.5          | 81 to 100             | 0.8          | 81 to 100             | 1.0          |
| 101 to 120            | 0.0          | 101 to 120            | 0.4          | 101 to 120            | 0.6          | 101 to 120            | 0.8          | 101 to 120            | 1.0          | 101 to 120            | 1.8          | 101 to 120            | 2.0          |
| 121 to 140            | 0.3          | 121 to 140            | 0.7          | 121 to 140            | 1.0          | 121 to 140            | 1.4          | 121 to 140            | 2.0          | 121 to 140            | 2.5          | 121 to 140            | 3.0          |
| 141 to 160            | 0.5          | 141 to 160            | 1            | 141 to 160            | 1.5          | 141 to 160            | 2.0          | 141 to 160            | 2.5          | 141 to 160            | 3.0          | 141 to 160            | 4.0          |
| 161 to 180            | 0.8          | 161 to 180            | 1.4          | 161 to 180            | 2.0          | 161 to 180            | 2.6          | 161 to 180            | 3            | 161 to 180            | 4.0          | 161 to 180            | 5.0          |
| 181 to 200            | 1.0          | 181 to 200            | 1.8          | 181 to 200            | 2.5          | 181 to 200            | 3.4          | 181 to 200            | 4            | 181 to 200            | 5.0          | 181 to 200            | 6.0          |
| 201 to 220            | 1.5          | 201 to 220            | 2.2          | 201 to 220            | 3.0          | 201 to 220            | 4.0          | 201 to 220            | 5            | 201 to 220            | 6.0          | 201 to 220            | 7.5          |
| 220 to 240            | 2.0          | 220 to 240            | 2.7          | 220 to 240            | 4.0          | 220 to 240            | 5.0          | 220 to 240            | 6            | 220 to 240            | 7.0          | 220 to 240            | 9.0          |
| 240 to 260            | 2.5          | 240 to 260            | 3.3          | 240 to 260            | 4.5          | 240 to 260            | 6.0          | 240 to 260            | 7            | 240 to 260            | 8.5          | 240 to 260            | 10.0         |
| 260 to 280            | 3.0          | 260 to 280            | 3.9          | 260 to 280            | 5.5          | 260 to 280            | 7.0          | 260 to 280            | 8            | 260 to 280            | 10.0         | 260 to 280            | 12.0         |
| 280 to 300            | 3.5          | 280 to 300            | 4.6          | 280 to 300            | 6.0          | 280 to 300            | 8.0          | 280 to 300            | 9            | 280 to 300            | 11.0         | 280 to 300            | 13.0         |
| 300 to 320            | 4.0          | 300 to 320            | 5.3          | 300 to 320            | 7.0          | 300 to 320            | 9.0          | 300 to 320            | 10.5         | 300 to 320            | 12.5         | 300 to 320            | 14.5         |
| 320 to 340            | 5.0          | 320 to 340            | 6.0          | 320 to 340            | 8.0          | 320 to 340            | 10.0         | 320 to 340            | 12           | 320 to 340            | 14           | 320 to 340            | 16           |
| 340 to 360            | 6.0          | 340 to 360            | 7.0          | 340 to 360            | 9.0          | 340 to 360            | 11.0         | 340 to 360            | 14           | 340 to 360            | 16.0         | 340 to 360            | 18.0         |
| 360 to 380            | 7.0          | 360 to 380            | 8.0          | 360 to 380            | 10.0         | 360 to 380            | 12.5         | 360 to 380            | 16           | 360 to 380            | 17.0         | 360 to 380            | 19.0         |

Med/Oct 13/Endocr 4610
